# Supplementary material for: The Association between Circulating Branched Chain Amino Acids and the Temporal Risk of Developing Type 2 Diabetes Mellitus: A Systematic Review & Meta-Analysis
Source: MDPI journal article supplement (doi:10.3390/nu14204411), 2022-10-20
Supplement: s1 [file s1]

|                                                                                                                                                                                                                                             | Selection           |                           |                               |                       |                        | Comparability                                                              | Outcome                   |                                                      |                   |               |
|---------------------------------------------------------------------------------------------------------------------------------------------------------------------------------------------------------------------------------------------|---------------------|---------------------------|-------------------------------|-----------------------|------------------------|----------------------------------------------------------------------------|---------------------------|------------------------------------------------------|-------------------|---------------|
| STUDY TITLE                                                                                                                                                                                                                                 | AUTHOR              | Case Definition Adequate? | Representatives of the cases? | Selection of Controls | Definition of controls | Comparability of cases and controls on the basis of the design or analysis | Ascertainment of Exposure | Same method of ascertainment for cases and controls? | Non-response rate | Overall Score |
| Altered asparagine and glutamate homeostasis precede coronary artery disease and type 2 diabetes                                                                                                                                            | F Ottosson [31]     | ★                         | -                             | ★                     | ★                      | ★★                                                                         | ★                         | ★                                                    | -                 | 7             |
| Metabolic signatures and risk of type 2 diabetes in a Chinese population: an untargeted metabolomics study using both LC-MS and GC-MS                                                                                                       | A Stancáková [44]   | ★                         | -                             | ★                     | ★                      | ★★                                                                         | ★                         | ★                                                    | ★                 | 8             |
| Plasma metabolites associated with type 2 diabetes in a Swedish population: a case-control study nested in a prospective cohort                                                                                                             | L Shi [47]          | ★                         | ★                             | ★                     | ★                      | ★★                                                                         | ★                         | ★                                                    | ★                 | 9             |
| Metabolite profiles and the risk of developing diabetes (Framingham Heart Study)                                                                                                                                                            | T Wang [41]         | ★                         | -                             | ★                     | ★                      | ★★                                                                         | ★                         | ★                                                    | ★                 | 8             |
| Metabolite Profiles and the Risk of Developing Diabetes (Malmö Heart Study)                                                                                                                                                                 | T Wang [41]         | ★                         | -                             | ★                     | ★                      | ★★                                                                         | ★                         | ★                                                    | ★                 | 8             |
| Identification of Serum Metabolites Associated With Risk of Type 2 Diabetes Using a Targeted Metabolomic Approach                                                                                                                           | A Floegel [42]      | ★                         | ★                             | ★                     | ★                      | ★★                                                                         | ★                         | ★                                                    | -                 | 8             |
| Novel biomarkers for pre-diabetes identified by metabolomics                                                                                                                                                                                | R Wang-Sattler [43] | ★                         | ★                             | ★                     | ★                      | ★★                                                                         | ★                         | ★                                                    | ★                 | 9             |
| Hyperglycemia and a common variant of GCKR are associated with the levels of eight amino acids in 9,369 Finnish men                                                                                                                         | A Stancáková [44]   | ★                         | -                             | ★                     | ★                      | ★★                                                                         | ★                         | ★                                                    | -                 | 7             |
| Diabetes risk and amino acid profiles: cross-sectional and prospective analyses of ethnicity, amino acids and diabetes in a South Asian and European cohort from the SABRE (Southall And Brent REvisited) Study (South Asian Male Patients) | T Tillin [45]       | ★                         | -                             | ★                     | ★                      | ★★                                                                         | ★                         | ★                                                    | ★                 | 8             |
| Diabetes risk and amino acid profiles: cross-sectional and prospective analyses of ethnicity, amino acids and diabetes in a South Asian and European cohort from the SABRE (Southall And Brent REvisited) Study (European Male Patients)    | T Tillin [45]       | ★                         | -                             | ★                     | ★                      | ★★                                                                         | ★                         | ★                                                    | ★                 | 8             |
| Metabolomic Profile Associated With Insulin Resistance and Conversion to Diabetes in the Insulin Resistance Atherosclerosis Study                                                                                                           | ND Palmer [29]      | ★                         | ★                             | ★                     | ★                      | ★★                                                                         | ★                         | ★                                                    | -                 | 8             |
