# Supplementary material for: The Association between Circulating Branched Chain Amino Acids and the Temporal Risk of Developing Type 2 Diabetes Mellitus: A Systematic Review & Meta-Analysis
Source: Nutrients. 2022 Oct 20;14(20):4411. doi: 10.3390/nu14204411 (PMC9610746; doi:10.3390/nu14204411)
Supplement: Supplementary file 1 [file nutrients-14-04411-s001.zip]

Archive with 5 entries (5 files):
- Supplementary S1 - PRISMA checklist.pdf
- Supplementary S2 - PICOS.pdf
- Supplementary S3 - PRISMA flow diagram.pdf
- Supplementary S4 - Risk of Bias.pdf
- Supplementary S5 - All database search.pdf
